# Supplementary material for: Transcriptome Profiling of Louisiana iris Root and Identification of Genes Involved in Lead-Stress Response
Source: MDPI journal article supplement (doi:10.3390/ijms161226084), 2015-11-25
Supplement: s1 [file s1]

# Supplementary Materials: Transcriptome Profiling of *Louisiana iris* Root and Identification of Genes Involved in Lead-Stress Responses Using next Generation Sequencing

Songqing Tian, Chunsun Gu, Liangqin Liu, Xudong Zhu, Yanhai Zhao and Suzhen Huang

**Table S1.** The enriched GO terms of up-regulated DEGs. Please see Table S1 (Excel).

**Table S2.** The enriched GO terms of down-regulated DEGs. Please see Table S2 (Excel).

**Table S3.** Enriched pathways of genes down-regulated by Pb stress.

| Transcript ID                              | Foldchange | Description                                       |
|--------------------------------------------|------------|---------------------------------------------------|
| <b>Biosynthesis of chelating compounds</b> |            |                                                   |
| comp152611_c0_seq1                         | 1.4021     | glutathione gamma-glutamylcysteinyltransferase    |
| comp473184_c0_seq1                         | 1.2303     | glutathione gamma-glutamylcysteinyltransferase 2  |
| comp142955_c0_seq5                         | 0.2476     | Metallothionein-like protein type 2               |
| comp183887_c0_seq1                         | -1.7325    | Metallothionein-like protein type 2               |
| comp57369_c0_seq1                          | 0.3975     | Metallothionein-like protein type 3               |
| <b>Activation of metal transporters</b>    |            |                                                   |
| comp103175_c0_seq1                         | 2.8875     | ABC transporter B family member 1                 |
| comp1035409_c0_seq1                        | 2.4854     | ABC transporter B family member 19                |
| comp104944_c0_seq1                         | -0.6374    | ABC transporter G family member 24                |
| comp149639_c0_seq1                         | 3.0764     | ABC transporter A family member 1                 |
| comp105611_c0_seq1                         | 1.3726     | ABC transporter A family member 9                 |
| comp106081_c0_seq1                         | 0.5025     | ABC transporter G family member 28                |
| comp725811_c0_seq1                         | 4.3923     | ABC transporter C family member 5                 |
| comp787957_c0_seq1                         | 3.8413     | ABC transporter G family member 12                |
| comp264126_c0_seq1                         | 3.7134     | ABC transporter B family member 3                 |
| comp1586198_c0_seq1                        | 3.5546     | ABC transporter C family member 7                 |
| comp26091_c0_seq1                          | -3.3074    | ABC transporter F family member 2                 |
| comp267439_c0_seq1                         | 2.3451     | Zinc transporter 1                                |
| comp127056_c0_seq1                         | 1.9794     | Zinc transporter 2                                |
| comp389851_c0_seq1                         | -3.1964    | Zinc transporter 8                                |
| comp1341294_c0_seq1                        | -2.1155    | Zinc transporter 9                                |
| comp295312_c0_seq1                         | -2.0000    | Iron-regulated protein 3                          |
| comp7283_c0_seq1                           | 1.5546     | Copper transporter 2                              |
| comp1480545_c0_seq1                        | 2.1155     | Magnesium transporter mgtE                        |
| comp465044_c0_seq1                         | 1.4203     | Copper-transporting ATPase HMA5                   |
| <b>Modulation of transcription factors</b> |            |                                                   |
| comp423843_c0_seq1                         | 1.2675     | Transcription factor bHLH104                      |
| comp129460_c0_seq1                         | -1.1117    | Ethylene-responsive transcription factor 2        |
| comp130772_c0_seq3                         | 1.5299     | Ethylene-responsive transcription factor ERF071   |
| comp52367_c0_seq1                          | 3.5206     | Ethylene-responsive transcription factor ERF094   |
| comp93080_c0_seq2                          | 2.9668     | Ethylene-responsive transcription factor 14       |
| comp95061_c0_seq1                          | 1.0359     | Ethylene-responsive transcription factor 5        |
| comp1824_c0_seq2                           | 3.3626     | Dehydration-responsive element-binding protein 2A |
| <b>Antioxidant-related genes</b>           |            |                                                   |
| comp105748_c0_seq1                         | 4.3399     | Secretoryperoxidase                               |
| comp135589_c0_seq1                         | 2.7327     | Ascorbateperoxidase                               |
| comp1264311_c0_seq1                        | -2.7370    | L-ascorbate peroxidase 5                          |
| comp143076_c0_seq1                         | 2.2541     | Peroxidase                                        |
| comp1017077_c0_seq1                        | 1.7244     | Superoxide dismutase [Cu-Zn]                      |
| comp1332564_c0_seq1                        | 1.2095     | Superoxide dismutase [Fe]                         |
| comp128035_c0_seq2                         | 2.4034     | Catalase                                          |

**Table. S4.** The primers for candidate genes that respond to heavy metal Pb.

| Primer                     | Sequence (5'–3')                               |
|----------------------------|------------------------------------------------|
| <i>comp152611_c0_seq1</i>  | CAAGTATCCTCCTCACTGGGT<br>CACTCCACCACAAGATGAAAG |
| <i>comp154333_c1_seq2</i>  | CGAAGGATTTGAGACTGGTG<br>TCATGGCCTCGTTTATTTTA   |
| <i>comp100849_c0_seq1</i>  | GGAAGTACGGACAGAAGCCC<br>GCGGTGTAGGTAATGATGAA   |
| <i>comp123900_c0_seq1</i>  | GGGACTACGCCAGGCTAAACT<br>TAAGGTGGAAGCTCTCCGACT |
| <i>comp145580_c0_seq1</i>  | GCTCCCTGTGGGCTATCGCTT<br>AGCTCCCCAATGACTTTGCGG |
| <i>comp160851_c0_seq1</i>  | GGTCCAAAACCATAAAGCAGG<br>AAGGACAGGAAAAAGCATAGC |
| <i>comp142858_c0_seq3</i>  | TCGGCACCGTCATCTTCATTA<br>TAGCTCCTTCGGGTTCTCAGG |
| <i>comp147199_c0_seq1</i>  | TTGCTCTCGGTTGCTATCTTG<br>TCTGGCAGTGCATCTTTCACT |
| <i>comp130772_c0_seq3</i>  | ATGTGTGGAGGTGCTATTATT<br>CTTCGGCTTAGGCTTCAGTTT |
| <i>comp1017906_c0_seq1</i> | ACCACCTGCAGATCAATCCAT<br>GCACCTTCTCTCTTTGCGAAA |
| <i>comp162326_c2_seq1</i>  | AACTACCTCCGCCCCGACAT<br>ATTGAGGGTTGCGGACTTGA   |
| <i>comp423843_c0_seq1</i>  | AGATGATTCTTTGGAGATGG<br>TTGACTCAGAACACGGATAGC  |
| UBC                        | TCTCGCTTGTCCGGTTTGTG<br>ACCTTGGGTGGCTTGAATGG   |
